# 1 **INSECT HERBIVORY ON URBAN TREES:** 2 **COMPLEMENTARY EFFECTS OF TREE** 3 **NEIGHBOURS AND PREDATION**

4 Alex Stemmelen<sup>1</sup>, Alain Paquette<sup>2</sup>\*, Marie-Lise Benot<sup>1</sup>, Yasmine Kadiri<sup>1</sup>,  
5 Hervé Jactel<sup>1</sup> and Bastien Castagneyrol<sup>1,\*</sup>

6  
7 1 - BIOGECO, INRAE, Univ. Bordeaux, 33610 Cestas, France

8 2 – Département des sciences biologiques, Centre d'étude de la forêt (CEF),

9 Université du Québec à Montréal, Centre-Ville Station, P.O. Box 8888,

10 Montréal, Qc H3C 3P8, Canada

11

12 \* **Corresponding authors:**

13 ● Bastien Castagneyrol, INRAE UMR BIOGECO, 69 route d'Arcachon,  
14 FR-33612 Cestas Cedex France, [bastien.castagneyrol@inrae.fr](mailto:bastien.castagneyrol@inrae.fr)

15 ● Alain Paquette, Département des sciences biologiques, Centre d'étude de  
16 la forêt (CEF), Université du Québec à Montréal, Centre-Ville Station,  
17 P.O. Box 8888, Montréal, Qc H3C 3P8, Canada,  
18 [paquette.alain@uqam.ca](mailto:paquette.alain@uqam.ca).

19

## 20 **Abstract**

- 21 1. Insect herbivory is an important component of forest ecosystems functioning and can  
22 affect tree growth and survival. Tree diversity is known to influence insect herbivory  
23 in natural forest, with most studies reporting a decrease in herbivory with increasing  
24 tree diversity. Urban ecosystems, on the other hand, differ in many ways from the  
25 forest ecosystem and the drivers of insect herbivory in cities are still debated.
- 26 2. We monitored 48 urban trees from five species – three native and two exotic – in three  
27 parks of Montreal (Canada) for leaf insect herbivory and predator activity on artificial  
28 larvae, evaluated the relationships between herbivory, predation, and tree diversity in  
29 the vicinity of focal trees.
- 30 3. Insect herbivory on leaves decreased with increasing tree diversity and with increasing  
31 predator attack rate.
- 32 4. Our findings indicate that tree diversity is a key determinant of multitrophic interactions  
33 between trees, herbivores and predators in urban environments and that managing tree  
34 diversity could contribute to pest control in cities.

35

36 **Keywords** : Artificial prey, Insect herbivory, Tree diversity, Top-down control, Urban  
37 biodiversity

## 38 Introduction

39 Insect herbivores have a major impact on tree growth and survival, hence on the functioning  
40 of forest ecosystems (Metcalf et al., 2014; Visakorpi et al., 2018; Zvereva, Zverev, & Kozlov,  
41 2012). Tree diversity significantly influences insect herbivory in forest ecosystems  
42 (Castagneyrol, Jactel, Vacher, Brockerhoff, & Koricheva, 2014; Jactel et al., 2017). Most  
43 studies report that herbivory declines as tree diversity increases (*i.e.*, associational resistance,  
44 Barbosa et al., 2009), although the opposite pattern has also been found (Haase et al., 2015;  
45 Schuldt et al., 2011). Recently, the interest in how tree diversity affects insect herbivory has  
46 expanded to include urban forests (Clem & Held, 2018; Dale & Frank, 2018; Frank, 2014),  
47 where pest damage can compromise the ecological and aesthetic values of urban trees (Nuckols  
48 & Connor, 1995; Tooker & Hanks, 2000; Tubby & Webber, 2010). Urban forests differ from  
49 natural forests in many ways. For example, most of the trees in cities are planted, found in  
50 lower density and/or mixed with native and exotic ornamental species that are rarely  
51 encountered in natural forests. Thus, given these specific characteristics of urban forests, it is  
52 still unclear how and why tree diversity might influence insect herbivory on urban trees.

53 The density and diversity of trees determine the amount and the quality of food and habitat  
54 resources available to herbivores and their enemies, and thus can have strong impact on the  
55 bottom-up and top-down forces acting upon insect herbivores (Haase et al., 2015; Muiruri,  
56 Rainio, & Koricheva, 2016; Setiawan, Vanhellefont, Baeten, Dillen, & Verheyen, 2014). For  
57 example, some insect herbivores, in particular generalist species, could take advantage of tree  
58 diversity to acquire more abundant, complementary food resources or benefit from a more  
59 balanced food mix, thus causing more damage in mixed forests (Lefcheck, Whalen, Davenport,  
60 Stone, & Duffy, 2013). In contrast, insect herbivores generally find it easier to identify and  
61 orientate towards the signals emitted by their host trees when the latter are more concentrated  
62 (*the resource concentration hypothesis*, Hambäck & Englund, 2005; Root, 1973) while non-  
63 host trees can emit volatile compounds that interfere with the ability of herbivores to detect  
64 their preferred host (Jactel, Birgersson, Andersson, & Schlyter, 2011). Finally, the abundance  
65 and diversity of predatory birds and arthropods generally increases with plant density and  
66 diversity, which would result in a better top-down regulation of insect herbivores (*the enemies*  
67 *hypothesis*, Risch, Andow, & Altieri, 1983; Root, 1973). However, the evidence available to  
68 support the enemies hypothesis in forest is controversial (Muiruri et al., 2016; Riihimäki,  
69 Kaitaniemi, Koricheva, & Vehviläinen, 2005; Staab & Schuldt, 2020) and the contribution of  
70 natural enemies to the control of herbivores in urban area remains poorly explored.

71 Tree diversity and density vary widely between and within cities (Ortega-Álvarez, Rodríguez-  
72 Correa, & MacGregor-Fors, 2011; Sjöman, Östberg, & Bühler, 2012). A consequence of this  
73 variability is that even within a common urban environment, herbivory may be reduced in some  
74 tree species and increased in others (Clem & Held, 2018; Frank, 2014), and the relative  
75 importance of bottom-up and top-down forces responsible for these effects may also differ. In  
76 addition, non-native trees have been widely planted in urban habitats (Cowett & Bassuk, 2014;  
77 Moro, Westerkamp, & de Araújo, 2014). While they often escape from herbivory by native

87 insects (*'the enemy escape hypothesis'*, Adams et al., 2009; Keane & Crawley, 2002), cases of  
88 native herbivores spilling-over onto exotic trees have been recorded (e.g. Branco, Brouckhoff,  
89 Castagnyrol, Orazio, & Jactel, 2015). Non-native tree species can also provide habitats to  
90 insectivorous birds or predatory arthropods (Gray & van Heezik, 2016). It is thus difficult to  
91 predict the effect of mixing native and exotic trees on insect herbivory in urban habitats (Clem  
92 & Held, 2018; Frank, 2014).

84 In this study, we investigated the effect of tree density, tree diversity, presence of conspecific  
85 trees, tree origin and predator activity on insect herbivory in urban trees of the city of Montreal  
86 (Quebec, Canada). We measured leaf area removed or otherwise damaged by insect herbivores  
87 on 48 trees of five species – three native and two exotic – in three urban parks. We  
88 concomitantly assessed predator activity by using artificial caterpillars exposed on tree  
89 branches. We tested the following hypotheses: (1) insect herbivory decreases with tree density,  
90 number of non-conspecific trees (host dilution) and diversity (associational resistance) around  
91 focal trees, (2) predator activity increases with increasing tree density and diversity and (3)  
92 predation and herbivory have different responses to tree diversity on native and exotic trees.  
93 By doing so, our study builds toward a better understanding of the drivers of pest insect damage  
94 on urban trees.

## 95 **Materials and methods**

### 96 **Study site**

97 The study was conducted in the city of Montreal (Canada, 45°50'N, -73°55'W), where the  
98 climate is temperate cold, with 6.8°C average temperature and 1000.3 mm annual rainfall  
99 during the 1981-2010 period (Pierre Elliott Trudeau airport weather station, [www.canada.ca](http://www.canada.ca)).  
100 The study took place in three parks of the southwest part of the city: Angrignon, Marguerite  
101 Bourgeoys and Ignace-Bourget (Table 1).

### 102 **Tree selection**

103 Every tree in Angrignon, Ignace-Bourget and Marguerite-Bourgeoys parks had been  
104 previously geolocalized and identified to the species level. This information was accessible  
105 through the city database for urban trees (<http://donnees.ville.montreal.qc.ca/dataset/arbres>).  
106 We selected a total of 48 trees of five deciduous species (Table 1). Three species are native to  
107 the study area (*Acer saccharinum* L., *Tilia americana* L., *Quercus rubra* L.) while two are  
108 exotics, from Europe (*Acer platanoides* L., *Tilia cordata* Mill.). These species are amongst the  
109 most abundant tree species in the city of Montreal where together they represent 37% of all the  
110 tree species of the public domain. In agreement with the city of Montreal administration, we  
111 only selected trees with a diameter at breast height (DBH) greater than 8 cm (mean  $\pm$  SD: 18.38  
112  $\pm$  9.36) (to withstand the sampling of leaves required for the experiment) and with low  
113 branches that could be easily accessed using a stepladder (for safety).

**Table 1.** Mean ( $\pm$  SD) diameter at breast height (in cm) and number of trees initially selected for each park and species.

| Species                 | Angrignon (AN)<br>(45°26'N, -73°36'W) | Marguerite-Bourgeoys (MB)<br>(45°47'N, -73°36'W) | Ignace-Bourguet (IB)<br>(45°45'N, -73°60'W) |
|-------------------------|---------------------------------------|--------------------------------------------------|---------------------------------------------|
| <i>Acer saccharinum</i> | 37.55 (n = 5)                         | 37.55 (n = 2)                                    | 15.1 (n = 2)                                |
| <i>Acer platanoides</i> | 21.60 (n = 1)                         | 23.68 $\pm$ 1.97 (n = 6)                         | 26.25 (n = 2)                               |
| <i>Tilia cordata</i>    | 22.40 (n = 1)                         | 30.60 $\pm$ 3.37 (n = 5)                         | 9.67 $\pm$ 0.51 (n = 4)                     |
| <i>Tilia americana</i>  | 10.52 $\pm$ 0.55 (n = 4)              | 22.06 $\pm$ 1.87 (n = 3)                         | 27.60 $\pm$ 1.20 (n = 3)                    |
| <i>Quercus rubra</i>    | 8.96 $\pm$ 0.37 (n = 5)               | NA                                               | 12.30 $\pm$ 1.45 (n = 5)                    |

## 114 Predation rate assessment

115 We used artificial caterpillars made with modelling clay to estimate predation rate on sampled  
116 trees (Ferrante, Lo Cacciato, & Lovei, 2014; Howe, Lövei, & Nachman, 2009). We installed  
117 15 artificial caterpillars per tree. We haphazardly selected three low (2.5-3.5 m from ground)  
118 branches facing different directions and installed five artificial caterpillars per branch (total:  
119 720 caterpillars). Caterpillars were 3 cm long, and modelled to match the approximate form  
120 and size of real caterpillars. They were modelled using a 1-cm ball of non-toxic and odourless  
121 green modelling clay (*Sculpey III String Bean colour*) and secured on thin branches using a 12-  
122 cm long, 0.5 mm diameter, non-shiny metallic wire.

123 We exposed artificial caterpillars for 11 days in late spring (from May 29<sup>th</sup> to June 9<sup>th</sup>, 2018)  
124 and for 6 days in early summer (from July 18<sup>th</sup> to July 24<sup>th</sup>, 2018). These seasons were chosen  
125 to cover the main activity period of both predators and herbivores. Artificial caterpillars were  
126 left untouched for the full duration of each survey. We estimated total predator attack rate as  
127 the number of artificial larvae with any predation mark, divided by the total length of the  
128 observation period in days. There were uncertainties regarding predator identity responsible  
129 for predation marks. Most of the marks were attributable to birds or arthropods, while very few  
130 were attributable to small mammals, therefore, we chose to combine predation marks primarily  
131 attributed to birds or arthropods into a single category, which we refer to as total predation.

132 Branches of three trees were accidentally pruned by city workers in late spring so that the  
133 predation rate could not be estimated on these trees for the first survey. Three new trees of the  
134 same species were selected for the second survey, in early summer.

## 135 Leaf insect herbivory

136 We estimated insect herbivory on leaves (Kozlov et al., 2017) as the percentage of leaf area  
137 removed or impacted by insect herbivores (including chewing, skeletonizing and mining  
138 damage, collectively referred to as ‘herbivory’). At the end of the second predation survey, we  
139 collected 10 leaves per branch on the same branches on which we had exposed artificial  
140 caterpillars, starting with the most apical, fully-developed, leaf to the 10th leaf down to branch  
141 basis (Total: 30 leaves per tree). We estimated total herbivory (i.e., total leaf area consumed or  
142 impacted by herbivores, regardless of their identity) as well as damage made by chewing,  
143 mining and sap-feeding herbivores at the level of individual leaves by using an ordinal scale of  
144 eight percentage classes of defoliation: 0%; 0-1%, 1-5%; 6-10%; 11-25%; 26-50%; 51-75%  
145 and 76-100%. We counted the number of galls per leaf. Most damage was made by leaf  
146 chewers, while other damage had a skewed distribution, preventing detailed analyses for each  
147 type of damage separately. We therefore analysed total herbivory by averaging herbivory at  
148 the level of individual trees and using the median of each class of defoliation. Herbivory was  
149 scored by a single observer (BC), who was blind to tree identity.

## 150 Tree neighbourhood

151 We used three variables to describe tree neighbourhood in a 20-m radius around each focal  
152 tree: tree density (defined as the number of neighbouring trees in that radius), tree species  
153 diversity (Shannon diversity index) and the number of conspecific trees around each focal tree.  
154 Those variables were obtained using QGIS Geographic Information System software (QGIS  
155 Development Team, 2018). Excluding focal tree species, the most common tree species in the  
156 vicinity of focal trees were the smooth serviceberry (*Amelanchier leavis* Wiegand), the white  
157 spruce (*Picea glauca* Voss), the green ash (*Fraxinus pennsylvanica* Marshall) and the eastern  
158 cottonwood (*Populus deltoides* Marshall), all of them native to the region. We should note that,  
159 as focal trees were not necessarily 20m or more apart, we could not avoid that some  
160 “neighbour” trees were used in more than one neighbourhood, and some focal trees were also  
161 within the neighbourhood of another focal tree.

## 162 Statistical analyses

163 We used the information theory framework to identify the best model fitting our data and  
164 applied model averaging whenever necessary to estimate model coefficient parameters  
165 (Grueber, Nakagawa, Laws, & Jamieson, 2011). We first built a full model including tree  
166 density (*Density*), tree diversity (*Diversity*), number of conspecifics (*Conspecific*), origin of the  
167 focal tree (*Origin*, native of exotic), park (*Park*), and predation rate (*Predation*) as fixed factors  
168 and tree species identity (*Species*) as a random factor:

$$\begin{aligned} 169 \quad Y_{ij} \sim & \beta_0 + \beta_1 \times \text{Density}_{ij} + \beta_2 \times \text{Diversity}_{ij} + \\ 170 & \beta_3 \times \text{Conspecific}_{ij} + \beta_4 \times \text{Origin}_{\text{exotic}, ij} + \beta_5 \times \text{Park}_{\text{TB}, ij} + \\ 171 & \beta_6 \times \text{Park}_{\text{MB}, ij} + \beta_6 \times \text{Predation}_{ij} + \\ 172 & \gamma_j + \varepsilon_{ij} \end{aligned} \quad (1)$$

173 
$$\gamma \sim N(0; \sigma_{\text{species}}^2) \quad \varepsilon \sim N(0; \sigma_e^2)$$

174 Where  $Y_{ij}$  is the herbivory on tree individual  $i$  in tree species  $j$ ,  $\beta$  are model coefficient  
175 parameters for fixed effects,  $\gamma_j$  is the random effect of tree species identity and  $\varepsilon$  the residuals.

176 To ease the interpretation of parameter estimates after model averaging, we standardized the  
177 input variables using Gelman's approach (Gelman, 2008). We then applied a procedure of  
178 model selection based on the Akaike's criterion corrected for small sample size (AICc) by  
179 running every model nested within the full model. As tree density and tree diversity were  
180 correlated (Pearson's correlation:  $r = 0.71$ ), we excluded all sub-models that included these  
181 predictors together. We ranked all models based on difference in AICc between each model  
182 and the top ranked model with the lowest AICc ( $\Delta\text{AICc}$ ). Models with a  $\Delta\text{AICc} < 2$  are  
183 generally considered equally supported by the data or not differentiable from the top ranked  
184 model. Finally, we estimated model fit by calculating marginal ( $R^2_m$ ) and conditional ( $R^2_c$ )  $R^2$   
185 values, corresponding to variance explained by fixed effects only ( $R^2_m$ ) and by fixed and  
186 random effects ( $R^2_c$ ) (Nakagawa & Schielzeth, 2013). When multiple models had a  $\Delta\text{AICc} <$   
187  $2$ , we used a model averaging approach to build a consensus model including all variables  
188 found in the set of best models. We considered that a given predictor had a significant effect if  
189 its 95% confidence interval did not overlap zero. When only one model had a  $\Delta\text{AICc} < 2$ , we  
190 used it as the best model. We used a square-root transformation of insect herbivory to satisfy  
191 model assumptions of normality and homogeneity of residuals.

192 We used the same approach to test the effect of tree neighbourhood on predation rate, log-  
193 transforming predation rate to satisfy model assumptions. Model equation (2) included the  
194 fixed effect of sampling season (*Season*) and the random effect of tree identity ( $\tau_k$ ), nested  
195 within tree species identity as an additional random factor accounting for repeated  
196 measurements of the same individuals:

197 
$$Y_{ijk} \sim \beta_0 + \beta_1 \times \text{Density}_{ijk} + \beta_2 \times \text{Diversity}_{ijk} +$$
  
198 
$$\beta_3 \times \text{Conspecific}_{ijk} + \beta_4 \times \text{Origin}_{\text{exotic}, ijk} + \beta_5 \times \text{Park}_{\text{IB}, ijk} +$$
  
199 
$$\beta_6 \times \text{Park}_{\text{MB}, ijk} + \beta_6 \times \text{Season}_{\text{summer}, ijk} +$$
  
200 
$$\gamma_j + \tau_{k|j} + \varepsilon_{ijk} \quad (2)$$
  
201 
$$\gamma \sim N(0; \sigma_{\text{species}}^2) \quad \tau \sim N(0; \sigma_{\text{individual}}^2) \quad \varepsilon \sim N(0; \sigma_e^2)$$

202  
203 Statistical analyses were performed using the R software version 3.4.4 (R Core Team 2019)  
204 with packages *lme4* (Bates, Mächler, Bolker, & Walker, 2015) and *MuMIn* (Barton 2019).

## 205 Results

206 **Insect herbivory** – Herbivory was on average ( $\pm$  SE)  $7.19 \pm 0.70$  % ( $n = 48$ ). Leaf damage was  
207 lower in *Acer platanoides* ( $3.53 \pm 0.54$ ) and *A. saccharinum* ( $3.86 \pm 0.47$ ) than in *Quercus*  
208 *rubra* ( $8.77 \pm 1.65$ ), *Tilia americana* ( $10.3 \pm 1.37$ ) and *T. cordata* ( $8.75 \pm 1.75$ ) (Fig. 1A).

209



210 There were six models competing with the top ranked model in a range of 2 units of  $\Delta AICc$   
211 (Table 2). These models included tree Shannon diversity, predation rate and tree origin as  
212 predictors. Insect herbivory decreased significantly with increasing tree diversity (average  
213 model coefficient parameter estimate  $\pm$  CI:  $-0.482 \pm [-0.91; -0.05]$ , Fig. 2A, Table 3) and with  
214 increasing predation rate ( $-0.473 \pm [-0.91; -0.003]$ ) (Fig. 2B, Table 3). Among the set of best  
215 models, fixed effects explained between 7 and 12% of variability in insect herbivory. Fixed  
216 and random effects together explained between 47 and 65% of variability in insect herbivory.

**Figure 1.** Effect of tree species identity on insect herbivory (A) and predation rate (B). Black dots and solid lines represents mean  $\pm$  SE calculated on raw data. Herbivory is the percentage of leaf area removed or impacted by herbivores in early summer. Predation events per caterpillar-day is the number of caterpillars attacked per day in late spring

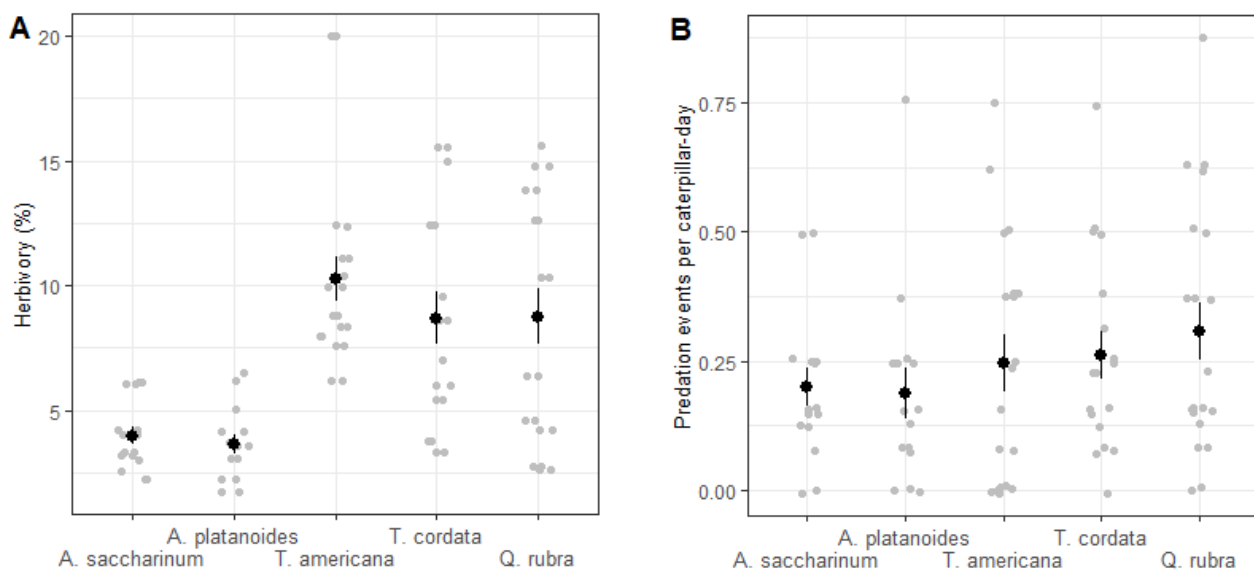

217 **Predation** – Of the 1,315 artificial caterpillars that we installed, 198 displayed marks  
218 unambiguously attributable to predators (*i.e.*, 15%). Predation rate varied between 0 and 0.87  
219 per caterpillar-day (Fig. 1B).

220 Only one model had a  $\Delta AICc < 2$  and was thus selected as the best model. This best model  
221 included only Season, with predation rate two times higher in late spring (mean  $\pm$  CI:  $0.44 \pm$   
222  $[0.31, 0.58]$  caterpillars $\cdot$ day $^{-1}$ ) than in early summer ( $0.20 \pm [0.16, 0.24]$  caterpillars $\cdot$ day $^{-1}$ ).  
223 Season explained 56 % of variability in predation rate and, collectively, fixed and random  
224 effects explained 59 % of variability in predation rate.

**Table 2.** Summary results of model selection of tree neighbourhood effect on herbivory rate: set of models with  $\Delta AICc < 2$ . Only predictors that were present at least once in the set of best models are represented.  $R^2m$  and  $R^2c$  represent fixed and fixed *plus* random factor, respectively.

| Model    | Model covariates |           |        |           | Model selection |        |               |                   |
|----------|------------------|-----------|--------|-----------|-----------------|--------|---------------|-------------------|
|          | Intercept        | Predation | Origin | Diversity | K               | Log L  | $\Delta AICc$ | $R^2m$ ( $R^2c$ ) |
| <b>1</b> | 2.53             |           |        | -0.52     | 1               | -46.44 | 0.00          | 0.09 (0.46)       |
| <b>2</b> | 2.52             | -0.52     |        | -0.44     | 2               | -45.18 | 0.04          | 0.12 (0.58)       |
| <b>3</b> | 2.51             | -0.51     |        |           | 1               | -46.79 | 0.70          | 0.07 (0.56)       |
| <b>4</b> | 2.53             | -0.44     | 0.171  | -0.43     | 3               | -44.64 | 1.67          | 0.12 (0.65)       |
| <b>5</b> | 2.53             |           | 0.078  | -0.52     | 2               | -46.07 | 1.82          | 0.08 (0.53)       |
| <b>6</b> | 2.53             | -0.53     | 0.357  |           | 2               | -46.12 | 1.92          | 0.08 (0.62)       |

**Table 3.** Summary results after model averaging: effects of each parameter presents on the set of best models on herbivory rate. Bold parameter are significant. Relative importance is a measure of the prevalence of each parameter in each model used in model averaging.

| Parameter          | Estimate | Adjusted SE | Confidence interval | Relative importance |
|--------------------|----------|-------------|---------------------|---------------------|
| <b>(Intercept)</b> | 2.53     | 0.31        | (1.91, 3.14)        |                     |
| <b>Diversity</b>   | -0.48    | 0.21        | (-0.91, -0.05)      | 0.72                |
| <b>Predation</b>   | -0.47    | 0.22        | (-0.91, -0.003)     | 0.64                |
| Origin             | 0.19     | 0.71        | (-1.20, 1.60)       | 0.31                |



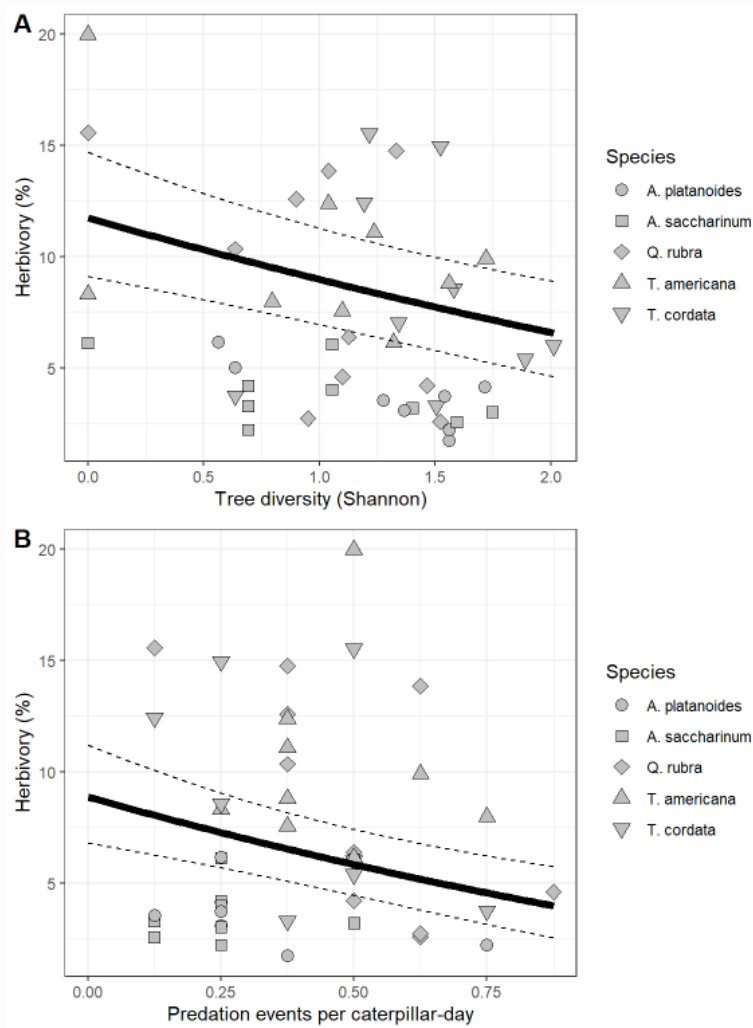

**Figure 2.** Effects of tree diversity (A) and predation rate (B) on insect herbivory. Solid and dashed lines represent prediction and adjusted standard error of the average model respectively (Table 3). Herbivory is the percentage of leaf area removed or impacted by herbivores in early summer. Tree diversity is represented by Shannon's diversity index. Predation events per caterpillar-day is the number of caterpillars attacked per day in late spring.

## 225 Discussion

226 We confirmed that tree diversity can influence insect herbivory on urban trees. Specifically,  
227 we found that insect herbivory decreased with increasing tree diversity providing support for  
228 the associational resistance hypothesis (Castagneyrol et al., 2017). We also found a negative  
229 correlation between predator attack rate and insect herbivory. Although further analyses are  
230 needed to confirm this relationship, our findings provide support for the view that increasing  
231 tree diversity can enhance regulation of insect herbivores by natural enemies in urban forests.

232 Our results are in line with several studies having reported reduced herbivory in trees  
233 surrounded by heterospecific neighbours (reviewed by Castagneyrol et al., 2014; Jactel et al.,  
234 2017). It also adds to the growing number of studies documenting diversity-resistance  
235 relationships in urban environments (Clem & Held 2018; Doherty, Meagher, & Dale 2019;

236 Frank 2014). However, it conflicts with other results suggesting an increase in herbivore  
237 abundance with increasing plant diversity in urban environments (Mata et al., 2017), although  
238 the relationship between herbivore abundance and actual herbivory is not always positively  
239 correlated (Barbosa et al., 2009; Schueller, Paul, Payer, Schultze, & Vikas, 2019). Tree  
240 diversity may have influenced the probability of focal trees being found and colonized by  
241 herbivores. Theory predicts that specialist herbivores have greater difficulties finding their host  
242 trees when they are surrounded by heterospecific neighbours (Castagneyrol et al., 2014; H.  
243 Jactel, Brockerhoff, & Duelli, 2009). It is possible that non-host neighbours disrupted the  
244 physical and chemical cues used by insect herbivores to locate their hosts (Damien et al., 2016;  
245 H. Jactel et al., 2011; Zhang & Schlyter, 2004). However, and contrary to our expectations, we  
246 did not find any significant effect of conspecific tree density on insect herbivory, thus ruling  
247 out the resource concentration hypothesis in this particular case. However, because our study  
248 was observational, we could not separate the effect of conspecific neighbour density from  
249 heterospecific neighbour density. In the absence of data on the identity of herbivores  
250 responsible for herbivory, further speculation would be hazardous.

251 Insect herbivory varied across tree species but did not differ between native and non-native  
252 species, thus not providing support for predictions of the enemy release hypothesis (Cincotta,  
253 Adams, & Holzapfel, 2009; Meijer, Schilthuizen, Beukeboom, & Smit, 2016). One possible  
254 explanation for this result could be that native herbivores spilled over exotic tree species from  
255 neighbouring native tree species, as it was recorded in previous studies (Branco et al., 2015).  
256 This would have been facilitated by the fact that exotic tree species (from Europe) had  
257 congeneric species in Canada. Although we only surveyed a handful of native and exotic  
258 species, making any generalization hazardous, we can speculate on the lack of difference  
259 between native and non-native species. It is also important to note that a large part of the  
260 variability in leaf insect damage was attributable to the species on which leaf samples were  
261 collected. In particular, both *Acer platanoides* and *A. saccharinum* were far less damaged than  
262 *Tilia cordata*, *T. americana* and *Quercus rubra*. In a recent study in Michigan, Schueller et al.,  
263 (2019) also reported greater insect herbivory (and herbivore diversity) on *Quercus* species as  
264 compared to *Acer* species, which is consistent with the view that plant species identity can  
265 drive arthropods community and abundance on forest host trees (Burghardt, Tallamy, &  
266 Gregory Shriver, 2009; Pearse & Hipp, 2009).

267 We found a significant negative correlation between predator attack rate and insect herbivory  
268 measured later in the season. This finding suggests a potential relationship between herbivory  
269 and predation in urban environments (Faeth, Warren, Shochat, & Marussich, 2005; Kozlov et  
270 al., 2017 but see Long & Frank, 2020). However, we refrain from concluding that predation  
271 was the main driver of insect herbivory for several reasons. First, the effect size of the  
272 herbivory-predation relationship was small, as was model  $R^2$  (Table 3). Second, concerns  
273 remain about how well predation on artificial prey represents of actual predation (Lövei &  
274 Ferrante, 2017; Rößler, Pröhl, & Lötters, 2018). In particular, artificial caterpillars used to  
275 assess predation rate modelled lepidopteran-like leaf chewing caterpillars and thus, caution is  
276 needed when it comes to extrapolate predator attack rates to other herbivore feeding guilds.  
277 Third, we had no information on actual natural prey density in focal and neighbouring trees.

278 Yet, prey availability may have influenced the functional response of bird insectivores (e.g.  
279 optimal foraging) such that we cannot exclude that herbivory actually drove predation rate  
280 instead of the other way around. Finally, the putative effect of predation on herbivory may be  
281 weak in respect to other factors acting directly upon herbivores in urban environments such as  
282 drought (Huberty & Denno, 2004; Mattson, 1980; Meineke & Frank, 2018), extreme heat (Dale  
283 & Frank, 2014; Meineke, Dunn, Sexton, & Frank, 2013) and pollution leading to altered foliage  
284 quality (Kozlov et al., 2017; Mattson, 1980; Moreira et al., 2019).

285 Contrary to the important effect of tree species identity on insect herbivory, tree species had no  
286 clear influence on predation rate on dummy caterpillars, which contradicts the view that tree  
287 species identity can modulate attack rates of caterpillars by birds (Mooney & Singer, 2012;  
288 Nell et al., 2018). Variation in predator density between plants is often related to an indirect  
289 effect of the plant on the density (Bailey et al. 2006) or quality (Brower et al. 1967, Clancy and  
290 Price, 1987) of their preys (herbivores). However, such effect of plant identity is not relevant  
291 when using dummy caterpillars, as neither their abundance nor their quality can be affected by  
292 plant species identity, which could explain the contradiction between past results and our study.

293 Predation was greater during the first survey, in late spring, than during the second survey, in  
294 early summer. This result could be explained either by a lower foliage density in trees in spring,  
295 making it easier for predators to detect artificial caterpillars, or by greater predator activity  
296 matching the phenology of wild caterpillars and feeding period of chicks (Coley, 1980; Raupp  
297 & Denno, 1983). We cannot either exclude that birds learned to avoid artificial caterpillars,  
298 thus resulting in much lower predation pressure during the second survey. However, unless  
299 bird ability to avoid artificial caterpillar varied between tree species and neighbourhood, we do  
300 not see this possibility as a major threat to our inferences.

## 301 Conclusion

302 Our study suggests several ecological factors drive leaf insect herbivory in the urban trees of  
303 the Montreal city. In particular, we found that insect herbivory decreased with both increasing  
304 tree diversity and predator activity. While biological invasions and global warming are  
305 increasing risks to urban trees, more and more cities choose to ban or reduce the use of  
306 pesticides in urban parks and green areas (Sustainable Use of Pesticides Directive 2009), such  
307 as in Montreal. In this context, diversifying urban tree cover in urban parks might help to reduce  
308 insect damage, which could result in a better provision of services provided by trees in cities  
309 (Beyer et al., 2014; Bowler, Buyung-Ali, Knight, & Pullin, 2010; Nowak, Hirabayashi, Bodine,  
310 & Greenfield, 2014).

## 311 Authors' contributions

312 BC and AP conceived the study. YK selected trees and coordinated field work. YK and BC  
313 acquired data. AS, MLB and BC analysed the data. AS, MLB and BC wrote the first draft.  
314 All authors contributed critically to the final manuscript.

## 315 **Acknowledgements**

316 This study has been carried out with financial support from (i) the French National Research  
317 Agency (ANR) in the frame of the Investments for the future Programme to BC, within the  
318 Cluster of Excellence COTE (ANR-10-LABX-45), (ii) the Conseil Franco-Québécois de  
319 Coopération Universitaire (FRQNT – Samuel-de-Champlain fund) to BC and AP, and (iii) a  
320 Discovery grant to AP from the Natural Sciences and Engineering Research Council of Canada.  
321 We thank Charles Desroches, Elyssa Cameron, Christian Messier, summer interns at UQAM,  
322 and the city of Montréal, Arrondissement du Sud-Ouest for their help with field work. We also  
323 thank Frédéric Barraquand and Benjamin Brachi for their constructive comments on the  
324 preliminary version of the paper. We thank Luc Barbaro and Steve Frank for their friendly  
325 reviews early drafts of this paper. Finally, we are grateful to Ian Pearse and Freerk Molleman  
326 for their reviews of prior manuscript versions.

## 327 **Data accessibility**

328 Data and script available from the Data INRAE repository: <https://doi.org/10.15454/R4NESA>

## 329 **Conflict of interest disclosure**

330 The authors of this article declare that they have no financial conflict of interest with the content  
331 of this article. Bastien Castagneyrol is one of the PCI Ecology recommenders.

## 332 References

- 333 Adams, J. M., Fang, W., Callaway, R. M., Cipollini, D., Newell, E., & Transatlantic Acer  
334 platanoides Invasion Network (TRAIN). (2009). A cross-continental test of the Enemy  
335 Release Hypothesis: leaf herbivory on Acer platanoides (L.) is three times lower in North  
336 America than in its native Europe. *Biological Invasions*, 11(4), 1005–1016. doi:  
337 10.1007/s10530-008-9312-4
- 338 Akaike, H. 1973. Information theory as an extension of the maximum likelihood principle. *In*:  
339 Second International Symposium on Information Theory (B.N. Petrov & F. Csaki, eds), pp.  
340 267–281. *Akademiai Kiado, Budapest*.
- 341 Barbosa, P., Hines, J., Kaplan, I., Martinson, H., Szczepaniec, A., & Szendrei, Z. (2009).  
342 Associational Resistance and Associational Susceptibility: Having Right or Wrong  
343 Neighbors. *Annual Review of Ecology, Evolution, and Systematics*, 40(1), 1–20. doi:  
344 10.1146/annurev.ecolsys.110308.120242
- 345 Bates, D., Mächler, M., Bolker, B., & Walker, S. (2015). Fitting Linear Mixed-Effects  
346 Models Using lme4. *Journal of Statistical Software*, 67(1). doi: 10.18637/jss.v067.i01
- 347 Beyer, K. M. M., Kaltenbach, A., Szabo, A., Bogar, S., Nieto, F. J., & Malecki, K. M. (2014).  
348 Exposure to Neighborhood Green Space and Mental Health: Evidence from the Survey of  
349 the Health of Wisconsin. *International Journal of Environmental Research and Public  
350 Health*, 11(3), 3453–3472. doi: 10.3390/ijerph110303453
- 351 Bowler, D. E., Buyung-Ali, L. M., Knight, T. M., & Pullin, A. S. (2010). A systematic  
352 review of evidence for the added benefits to health of exposure to natural environments.  
353 *BMC Public Health*, 10, 456. doi: 10.1186/1471-2458-10-456
- 354 Castagneyrol, B., Bonal, D., Damien, M., Jactel, H., Meredieu, C., Muiruri, E. W., &  
355 Barbaro, L. (2017). Bottom-up and top-down effects of tree species diversity on leaf  
356 insect herbivory. *Ecology and Evolution*, 7(10), 3520–3531. doi: 10.1002/ece3.2950
- 357 Castagneyrol, B., Jactel, H., Vacher, C., Brockerhoff, E. G., & Koricheva, J. (2014). Effects  
358 of plant phylogenetic diversity on herbivory depend on herbivore specialization. *Journal  
359 of Applied Ecology*, 51(1), 134–141. doi: 10.1111/1365-2664.12175
- 360 Cincotta, C. L., Adams, J. M., & Holzapfel, C. (2009). Testing the enemy release hypothesis:  
361 a comparison of foliar insect herbivory of the exotic Norway maple (*Acer platanoides*  
362 L.) and the native sugar maple (*A. saccharum* L.). *Biological Invasions*, 11(2), 379–388.  
363 doi: 10.1007/s10530-008-9255-9
- 364 Clem, C. S., & Held, D. W. (2018). Associational Interactions Between Urban Trees: Are  
365 Native Neighbors Better Than Non-Natives? *Environmental Entomology*, 47(4), 881–889.  
366 doi: 10.1093/ee/nvy071
- 367 Coley, P. D. (1980). Effects of leaf age and plant life history patterns on herbivory. *Nature*,  
368 284, 545–546. doi: 10.1038/284545a0
- 369 Cowett, F. D., & Bassuk, N. L. (2014). Statewide assessment of street trees in New York  
370 State, USA. *Urban Forestry & Urban Greening*, 13(2), 213–220. doi:  
371 10.1016/j.ufug.2014.02.001
- 372 Dale, A. G., & Frank, S. D. (2018). Urban plants and climate drive unique arthropod  
373 interactions with unpredictable consequences. *Current Opinion in Insect Science*, 29,  
374 27–33. doi: 10.1016/j.cois.2018.06.001
- 375 Dale, A. G., & Frank, S. D. (2014). Urban warming trumps natural enemy regulation of  
376 herbivorous pests. *Ecological Applications: A Publication of the Ecological Society of  
377 America*, 24(7), 1596–1607. doi: 10.1890/13-1961.1
- 378 Damien, M., Jactel, H., Meredieu, C., Régolini, M., van Halder, I., & Castagneyrol, B.  
379 (2016) Pest damage in mixed forests: Disentangling the effects of neighbor identity, host



- 380 density and host apparency at different spatial scales. *Forest Ecology and Management*,  
381 378, 103–110. doi: 10.1016/j.foreco.2016.07.025
- 382 Doherty, E. M., Meagher, R. L., & Dale, A. G. (2019). Turfgrass Cultivar Diversity Provides  
383 Associational Resistance in the Absence of Pest Resistant Cultivars. *Environmental*  
384 *Entomology*, 48(3), 623–632. doi: 10.1093/ee/nvz026
- 385 Faeth, S. H., Warren, P. S., Shochat, E., & Marussich, W. A. (2005). Trophic Dynamics in  
386 Urban Communities. *BioScience*, 55(5), 399–407. doi:  
387 10.1641/0006-3568(2005)055[0399:TDIUC]2.0.CO;2
- 388 Ferrante, M., Lo Cacciato, A., & Lövei, G. (2014). Quantifying predation pressure along an  
389 urbanisation gradient in Denmark using artificial caterpillars. *European Journal of*  
390 *Entomology*, 111(5), 649–654.
- 391 Frank, Steven D. (2014). Bad neighbors: urban habitats increase cankerworm damage to  
392 non-host understory plants. *Urban Ecosystems*, 17(4), 1135–1145. doi:  
393 10.1007/s11252-014-0368-x
- 394 Gelman, A. (2008). Scaling regression inputs by dividing by two standard deviations.  
395 *Statistics in Medicine*, 27(15), 2865–2873. doi: 10.1002/sim.3107
- 396 Grueber, C. E., Nakagawa, S., Laws, R. J., & Jamieson, I. G. (2011). Multimodel inference in  
397 ecology and evolution: challenges and solutions. *Journal of Evolutionary Biology*,  
398 24(4), 699–711. doi: 10.1111/j.1420-9101.2010.02210.x
- 399 Hambäck, P. A., & Englund, G. (2005). Patch area, population density and the scaling of  
400 migration rates: the resource concentration hypothesis revisited. *Ecology Letters*, 8(10),  
401 1057–1065. doi: 10.1111/j.1461-0248.2005.00811.x
- 402 Howe, A., Lövei, G. L., & Nachman, G. (2009). Dummy caterpillars as a simple method to  
403 assess predation rates on invertebrates in a tropical agroecosystem. *Entomologia*  
404 *Experimentalis et Applicata*, 131(3), 325–329. doi: 10.1111/j.1570-7458.2009.00860.x
- 405 Huberty, A. F., & Denno, R. F. (2004). Plant Water Stress and Its Consequences for  
406 Herbivorous Insects: A New Synthesis. *Ecology*, 85(5), 1383–1398.
- 407 Jactel, H., Birgersson, G., Andersson, S., & Schlyter, F. (2011). Non-host volatiles mediate  
408 associational resistance to the pine processionary moth. *Oecologia*, 166(3), 703–711. doi:  
409 10.1007/s00442-011-1918-z
- 410 Jactel, H., Brockerhoff, E., & Duelli, P. (2009). A Test of the Biodiversity-Stability Theory:  
411 Meta-analysis of Tree Species Diversity Effects on Insect Pest Infestations, and  
412 Re-examination of Responsible Factors. In M. Scherer-Lorenzen, C. Körner, & E.-D.  
413 Schulze (Eds.), *Forest Diversity and Function: Temperate and Boreal Systems* (pp. 235–  
414 262). doi: 10.1007/3-540-26599-6\_12
- 415 Staab, M., & Schuldt, A. (2020). The Influence of Tree Diversity on Natural Enemies—a  
416 Review of the “Enemies” Hypothesis in Forests. *Current Forestry Reports*.  
417 doi: 10.1007/s40725-020-00123-6
- 418 Jactel, H., Bauhus, J., Boberg, J., Bonal, D., Castagneyrol, B., Gardiner, B., ... Brockerhoff,  
419 E. G. (2017). Tree Diversity Drives Forest Stand Resistance to Natural Disturbances.  
420 *Current Forestry Reports*, 3(3), 223–243. doi: 10.1007/s40725-017-0064-1
- 421 Keane, R., & Crawley, M. J. (2002). Exotic plant invasions and the enemy release hypothesis.  
422 *Trends in Ecology & Evolution*, 17(4), 164–170. doi: 10.1016/S0169-5347(02)02499-0
- 423 Kozlov, M. V., Lanta, V., Zverev, V., Rainio, K., Kunavin, M. A., & Zvereva, E. L. (2017).  
424 Decreased losses of woody plant foliage to insects in large urban areas are explained by  
425 bird predation. *Global Change Biology*, 23(10), 4354–4364. doi: 10.1111/gcb.13692
- 426 Kozlov, M. V., Zverev, V., & Zvereva, E. L. (2017). Combined effects of environmental  
427 disturbance and climate warming on insect herbivory in mountain birch in subarctic  
428 forests: Results of 26-year monitoring. *Science of The Total Environment*, 601–602, 802–  
429 811. doi: 10.1016/j.scitotenv.2017.05.230



- 430 Lefcheck, J. S., Whalen, M. A., Davenport, T. M., Stone, J. P., & Duffy, J. E. (2013).  
431 Physiological effects of diet mixing on consumer fitness: a meta-analysis. *Ecology*, 94(3),  
432 565-572.
- 433 Long, L. C., & Frank, S. D. (2020). Risk of bird predation and defoliating insect abundance  
434 are greater in urban forest fragments than street trees. *Urban Ecosystems*. doi:  
435 10.1007/s11252-020-00939-x
- 436 Lövei, G. L., & Ferrante, M. (2017). A review of the sentinel prey method as a way of  
437 quantifying invertebrate predation under field conditions. *Insect Science*, 24(4), 528–542.  
438 doi: 10.1111/1744-7917.12405
- 439 Mata, L., Threlfall, C. G., Williams, N. S. G., Hahs, A. K., Malipatil, M., Stork, N. E., &  
440 Livesley, S. J. (2017). Conserving herbivorous and predatory insects in urban green  
441 spaces. *Scientific Reports*, 7. doi: 10.1038/srep40970
- 442 Mattson, W. J. (1980). Herbivory in Relation to Plant Nitrogen Content. *Annual Review of*  
443 *Ecology and Systematics*, 11(1), 119–161. doi: 10.1146/annurev.es.11.110180.001003
- 444 Meijer, K., Schilthuizen, M., Beukeboom, L., & Smit, C. (2016). A review and meta-analysis  
445 of the enemy release hypothesis in plant-herbivorous insect systems. *PeerJ*, 4, e2778. doi:  
446 10.7717/peerj.2778
- 447 Meineke, E. K., Dunn, R. R., Sexton, J. O., & Frank, S. D. (2013). Urban warming drives  
448 insect pest abundance on street trees. *PloS One*, 8(3), e59687. doi:  
449 10.1371/journal.pone.0059687
- 450 Meineke, E. K., & Frank, S. D. (2018). Water availability drives urban tree growth responses  
451 to herbivory and warming. *Journal of Applied Ecology*, 55(4), 1701–1713.  
452 doi:10.1111/1365-2664.13130
- 453 Metcalfe, D. B., Asner, G. P., Martin, R. E., Espejo, J. E. S., Huasco, W. H., Amézquita, F. F.  
454 F., ... Malhi, Y. (2014). Herbivory makes major contributions to ecosystem carbon and  
455 nutrient cycling in tropical forests. *Ecology Letters*, 17(3), 324–332. doi:  
456 10.1111/ele.12233
- 457 Mooney, K.A. & Singer, M.S. (2012). Plant effects on herbivore-enemy interactions in natural  
458 systems. In *Trait-Mediated Indirect Interactions: Ecological and Evolutionary*  
459 *Perspectives* (eds Ohgushi, T., Schmitz, O., Holt, R.D.). Cambridge University Press,  
460 Cambridge, pp. 107–130.
- 461 Moreira, X., Abdala-Roberts, L., Teran, J. C. B. M. y, Covelo, F., Mata, R. de la, Francisco,  
462 M., Tack, A. J. M. (2019). Impacts of urbanization on insect herbivory and plant  
463 defences in oak trees. *Oikos*, 128(1), 113–123. doi: 10.1111/oik.05497
- 464 Moro, M. F., Westerkamp, C., & de Araújo, F. S. (2014). How much importance is given to  
465 native plants in cities' treescape? A case study in Fortaleza, Brazil. *Urban Forestry &*  
466 *Urban Greening*, 13(2), 365–374. doi: 10.1016/j.ufug.2014.01.005
- 467 Muiruri, E. W., Rainio, K., & Koricheva, J. (2016). Do birds see the forest for the trees?  
468 Scale-dependent effects of tree diversity on avian predation of artificial larvae.  
469 *Oecologia*, 180(3), 619–630. doi: 10.1007/s00442-015-3391-6
- 470 Nakagawa, S., & Schielzeth, H. (2013). A general and simple method for obtaining R<sup>2</sup> from  
471 generalized linear mixed-effects models. *Methods in Ecology and Evolution*, 4(2), 133–  
472 142. doi: 10.1111/j.2041-210x.2012.00261.x
- 473 Nell, C., Abdala-Roberts, L., Parra-Tabla, V. & Mooney, K. (2018). Tropical tree diversity  
474 mediates foraging and predatory effects of insectivorous birds. *Proc. R Soc. B*, 285,  
475 20181842
- 476 Nowak, D. J., Hirabayashi, S., Bodine, A., & Greenfield, E. (2014). Tree and forest effects on  
477 air quality and human health in the United States. *Environmental Pollution (Barking,*  
478 *Essex:1987)*, 193, 119–129. doi: 10.1016/j.envpol.2014.05.028
- 479 Nuckols, M. S., & Connor, E. F. (1995). Do trees in urban or ornamental plantings receive

- 480 more damage by insects than trees in natural forests? *Ecological Entomology*, 20(3), 253–  
481 260. doi: 10.1111/j.1365-2311.1995.tb00455.x
- 482 Ortega-Álvarez, R., Rodríguez-Correa, H. A., & MacGregor-Fors, I. (2011). Trees and the  
483 City: Diversity and Composition along a Neotropical Gradient of Urbanization.  
484 *International Journal of Ecology*, doi: <https://doi.org/10.1155/2011/704084>
- 485 Pearse, I. S., & Hipp, A. L. (2009). Phylogenetic and trait similarity to a native species  
486 predict herbivory on non-native oaks. *Proceedings of the National Academy of Sciences*,  
487 106(43), 18097–18102. doi: 10.1073/pnas.0904867106
- 488 QGIS Development Team (2019). QGIS Geographic Information System. Open Source  
489 Geospatial Foundation Project.
- 490 R Core Team (2019). R: A language and environment for statistical computing. R Foundation  
491 for Statistical Computing, Vienna, Austria. URL <https://www.R-project.org/>.
- 492 Raupp, & Denno. (1983). Leaf age as a predictor of herbivore distribution and abundance  
493 [Herbivorous insects including the willow leaf beetle]. In *Academic Press. Variables*  
494 *Plants and Herbivores in Natural and Managed Systems*.
- 495 Revision of World Urbanization Prospects | Multimedia Library - United Nations  
496 Department of Economic and Social Affairs Retrieved May 30, 2019, from  
497 [https://www.un.org/development/desa/publications/2018-revision-of-world-urbanization-](https://www.un.org/development/desa/publications/2018-revision-of-world-urbanization-prospects.html)  
498 [prospects.html](https://www.un.org/development/desa/publications/2018-revision-of-world-urbanization-prospects.html)
- 499 Riihimäki, J., Kaitaniemi, P., Koricheva, J., & Vehviläinen, H. (2005). Testing the enemies  
500 hypothesis in forest stands: the important role of tree species composition. *Oecologia*,  
501 142(1), 90–97. doi: 10.1007/s00442-004-1696-y
- 502 Root, R. B. (1973). Organization of a Plant-Arthropod Association in Simple and Diverse  
503 Habitats: The Fauna of Collards (*Brassica Oleracea*). *Ecological Monographs*, 43(1),  
504 95–124. doi: 10.2307/1942161
- 505 Sjöman, H., Östberg, J., & Bühler, O. (2012). Diversity and distribution of the urban tree  
506 population in ten major Nordic cities. *Urban Forestry & Urban Greening*, 11(1), 31–39.  
507 doi: 10.1016/j.ufug.2011.09.004
- 508 Sustainable use of pesticides. Retrieved May 30, 2019, from  
509 [https://ec.europa.eu/food/plant/pesticides/sustainable\\_use\\_pesticides\\_en](https://ec.europa.eu/food/plant/pesticides/sustainable_use_pesticides_en)
- 510 Tubby, K. V., & Webber, J. F. (2010). Pests and diseases threatening urban trees under a  
511 changing climate. *Forestry: An International Journal of Forest Research*, 83(4), 451–  
512 459. doi: 10.1093/forestry/cpq027
- 513 Visakorpi, K., Gripenberg, S., Malhi, Y., Bolas, C., Oliveras, I., Harris, N., ... Riutta, T.  
514 (2018). Small-scale indirect plant responses to insect herbivory could have major impacts  
515 on canopy photosynthesis and isoprene emission. *The New Phytologist*, 220(3), 799–810.  
516 doi: 10.1111/nph.15338
- 517 Zhang, Q.-H., & Schlyter, F. (2004). Olfactory recognition and behavioural avoidance of  
518 angiosperm nonhost volatiles by conifer-inhabiting bark beetles. *Agricultural and Forest*  
519 *Entomology*, 6(1), 1–20. doi: 10.1111/j.1461-9555.2004.00202.x
- 520 Zvereva, E. L., Zverev, V., & Kozlov, M. V. (2012). Little strokes fell great oaks: minor but  
521 chronic herbivory substantially reduces birch growth. *Oikos*, 121(12), 2036–2043. doi:  
522 10.1111/j.1600-0706.2012.20688.x
